# Supplementary material for: A long non‐coding RNA signature for diagnostic prediction of sepsis upon ICU admission
Source: PubMed Central journal article supplement (PMC7418814; doi:10.1002/ctm2.123), 2020-07-02
Supplement: CTM2-10-e123-s002.pdf [file CTM2-10-e123-s002.pdf]

**Table S1.** Discovery and validation cohorts used in this study.

| <b>GSE Number</b> | <b>Tissue</b> | <b>Sepsis (N)</b>          | <b>Control (N)</b>    | <b>Platform</b> |
|-------------------|---------------|----------------------------|-----------------------|-----------------|
| GSE95233          | Whole blood   | Septic shock samples (102) | Healthy controls (22) | HG-U133_Plus_2  |
| GSE57065          | Whole blood   | Septic shock samples (82)  | Healthy controls (25) | HG-U133_Plus_2  |
| GSE28750          | Whole blood   | Sepsis samples (10)        | Healthy controls (20) | HG-U133_Plus_2  |
